# Supplementary material for: Role of Hydrophobins in Aspergillus fumigatus
Source: PubMed Central journal article supplement (PMC5872305; doi:10.3390/jof4010002), 2017-12-24
Supplement: jof-04-00002-s001.pdf [file jof-04-00002-s001.pdf]

**Table S1: Primers used in this study**

| Name                                       | Primer sequence                                                         | N° |
|--------------------------------------------|-------------------------------------------------------------------------|----|
| pUC19 NruI upstream RodA F                 | 5'CCAGTGAATTCGAGCTCGGTACTCGCGAGACGATGACTTGTAATATAT3'                    | 1  |
| Upstream RodA Chlo <sup>R</sup> -β Rec R   | 5'GCATAAATATGGTCCATCTAGT <u>GCTGTGACGGTGGGGCTTTAAAAAGGGAG3'</u>         | 2  |
| Chlo <sup>R</sup> -β Rec downstream RodA F | 5'TATAGGACCTGAGTGATGCGCTACTCGCTCTCTGCT3'                                | 3  |
| Downstream RodA NruI pUC19 R               | 5'CGCCAAGCTTGCATGCCTCGCGAGGGGGTCTACGATCTTTCTGTGGATA3'                   | 4  |
| pUC19 FspI upstream RodB F                 | 5'TGAATTCGAGCTCGGTACTGCGCA <u>CCCCCTTACCCTTTGGCTGGAGT3'</u>             | 5  |
| Upstream RodB HPH <sup>R</sup> -β Rec R    | 5'GACCTATAGGACCTGAGTGATGCTGAGAAATGGGTTAGAGGAGTTTGC3'                    | 6  |
| HPH <sup>R</sup> -β Rec downstream RodB F  | 5'TGGTCCATCTAGT <u>GCGGACTTGAGGAGCGTTAATAATCGAGA3'</u>                  | 7  |
| Downstream RodB pUC19 R                    | 5'TACGCCAAGCTTGCATGCCTGCGCA <u>AAGCCAGCGAGACCTACCGGGT3'</u>             | 8  |
| puC18 SmaI upstream RodC F                 | 5'GCCAAGCTTGCATGCCCGGGGACTTATTAATGAGGATCTTTATGCTCTT3'                   | 9  |
| Upstream RodC HPH <sup>R</sup> -β Rec R    | 5'GGACCTGAGTGATGCTATGACCAGTAATTATATTCTATGCCAGTC3'                       | 10 |
| HPH <sup>R</sup> -β Rec downstream RodC F  | 5'TGGTCCATCTAGT <u>GCCCTGGTTGTCACCTATCTATAATCATCTCTC3'</u>              | 11 |
| Downstream RodC SmaI pUC18 R               | 5'AATTCGAGCTCGGTACCCCGGAAGAGTATTACCTACATCTGTACCGCA3'                    | 12 |
| pUC18 upstream FspI RodD F                 | 5'GCCAAGCTTGCATGCCTGCGCATATATAGATGCATAGAGGTGATACCCA3'                   | 13 |
| Upstream RodD HPH <sup>R</sup> -β Rec R    | 5'GGACCTGAGTGATGCGATATGATAAGACCGAGACAGATAAGATAA3'                       | 14 |
| HPH <sup>R</sup> -β Rec downstream RodD F  | 5'TGGTCCATCTAGT <u>GCGGTTTCTTATAATCAATGGGCAAAGTA3'</u>                  | 15 |
| Downstream RodD FspI pUC18 R               | 5'AATTCGAGCTCGGTACTGCGCAGTAGAGTTTGTGCTCTTTGGGATAGTAAC3'                 | 16 |
| puC18 FspI upstream RodE F                 | 5'GCCAAGCTTGCATGCCTGCGCA <u>ATTTCACTGACTGTCTCCATCTTTAT3'</u>            | 17 |
| Upstream RodE HPH <sup>R</sup> -β Rec R    | 5'GGACCTGAGTGATGCGAGTTTGGAGTCTGTGATGTGATTGAGT3'                         | 18 |
| HPH <sup>R</sup> -β Rec downstream RodE F  | 5'TGGTCCATCTAGTGCATACTTACTCGATATTAGAACGGACTCATT3'                       | 19 |
| Downstream RodE FspI pUC18 R               | 5'AATTCGAGCTCGGTACTGCGCAAGTATAGGACTATAGGTAAGGTGCTCCTCTG3'               | 20 |
| pUC19 FspI upstream RodF F                 | 5'AATTCGAGCTCGGTACTGCGCACATCATCTTCATTCTGTCT3'                           | 21 |
| Upstream RodF HPH <sup>R</sup> -β Rec R    | 5'ATAGGACCTGAGTGATGCTGTGTGCGAAGTCGATGTTGGCG3'                           | 22 |
| HPH <sup>R</sup> -β Rec downstream RodF F  | 5'TAATATGGTCCATCTAGTGCATTCCTGCTCGGGGTCTCT3'                             | 23 |
| Downstream RodF FspI pUC19 R               | 5'GCCAAGCTTGCATGCCTGCGCAGGTGAAATATCTACTGTACA3'                          | 24 |
| pUC19 FspI upstream RodG F                 | 5'AATTCGAGCTCGGTACTGCGCATAAGTGTCTATCATCCACC3'                           | 25 |
| Upstream RodG HPH <sup>R</sup> -β Rec R    | 5'TATAGGACCTGAGTGATGCTGTGGAGATAGAGGATGTTTGAGA3'                         | 26 |
| HPH <sup>R</sup> -β Rec downstream RodG F  | 5'ATAATATGGTCCATCTAGTGCCTACCGGTTTTGAGGTTCAA3'                           | 27 |
| Downstream RodG FspI pUC19 R               | 5'GCCAAGCTTGCATGCCTGCGCACCGCATCTCGTCTCTCGTTGCT3'                        | 28 |
| ORF RodC + flag tag R                      | 5' <u>TCCGCTCTATCGTCATCGTCTTATAGTCTCCGCTACCCAGCGAGGTTGCTCAGAAG3'</u>    | 29 |
| ORF RodC + flag tag F                      | 5' <u>GGTAGCGGAGACTATAAGGACGATGACGATAAGAGCGGAGGTTCCGGAATAAGCAGCAT3'</u> | 30 |
| ORF RodC Stop Chlo <sup>R</sup> -β Rec R   | 5'GCATAAATATGGTCCATCTAGTCTTACGCAACCGATCCCAAAGCAATG3'                    | 31 |
| Chlo <sup>R</sup> -β Rec Downstream RodC F | 5'CCTATAGGACCTGAGTGATGCGGTTATGATGGCATATGAACG3'                          | 32 |
| Upstream RodC screen F                     | 5' <u>ACTGGTGGGAAAGATTGTG3'</u>                                         | 33 |
| Downstream RodC screen R                   | 5' <u>AGACAACGAAAAACCGGACT3'</u>                                        | 34 |

Not underlined = pUC18, pUC19, HPH<sup>R</sup>-β Rec or Chlo<sup>R</sup>-β Rec  
Underlined = Hydrophobins borders or ORF DNA sequences  
Bold = Partial or total restriction enzyme sequences  
Double underlined = Flag tag sequence

**Table S2:** ELISA data (OD 492 nm) of new polyclonal antisera against recombinant hydrophobins rRodA, rRodB and rRodF without their signal peptide.

|                           | <b>11:500 dilution</b> | <b>1:2500 dilution</b> |
|---------------------------|------------------------|------------------------|
| <b>Antisera anti-RodA</b> | 2,778                  | 2,127                  |
| <b>Antisera anti-RodB</b> | 2,157                  | 2,168                  |
| <b>Antisera anti-RodF</b> | 2,281                  | 1,774                  |

**Table S3:** Percentage of identities (top) and similarities (bottom) between *A. fumigatus* hydrophobins.

|             | <b>RodB</b>  | <b>RodC</b>  | <b>RodD</b>  | <b>RodE</b>  | <b>RodF</b>  | <b>RodG</b>  |
|-------------|--------------|--------------|--------------|--------------|--------------|--------------|
| <b>RodA</b> | 44.8<br>58.1 | 60.9<br>72.7 | 14.8<br>21.0 | 19.6<br>26.5 | 12.7<br>20.9 | 20.7<br>26.8 |
| <b>RodB</b> |              | 40.0<br>51.4 | 16.0<br>25.9 | 20.6<br>31.4 | 19.0<br>25.7 | 20.7<br>28.0 |
| <b>RodC</b> |              |              | 14.8<br>22.2 | 19.6<br>26.5 | 11.8<br>17.3 | 17.1<br>23.2 |
| <b>RodD</b> |              |              |              | 16.0<br>19.8 | 13.6<br>18.5 | 13.6<br>16.0 |
| <b>RodE</b> |              |              |              |              | 17.6<br>25.5 | 30.5<br>37.8 |
| <b>RodF</b> |              |              |              |              |              | 25.6<br>35.4 |

**Table S4:** CMI values of hydrophobin mutants and the parental strain ku80 incubated in presence of congo red or calcofluor white for 48 hr at 37°C in MM medium. No statistically significant difference in the CMIs for each drug.

| <b>Strains</b>                             | <b>ku80</b> | <b><i>ΔrodA</i></b> | <b><i>ΔrodBCDEFG</i></b> | <b><i>ΔrodBCDEFGA</i></b> |
|--------------------------------------------|-------------|---------------------|--------------------------|---------------------------|
| <b>MIC posaconazole (μg/ml)</b>            | 0,25        | 0,25-0,5            | 0,25                     | 0,25                      |
| <b>MEC caspofungin (μg/ml)</b>             | 0,25        | 0,25                | 0,25                     | 0,25                      |
| <b>MIC H<sub>2</sub>O<sub>2</sub> (mM)</b> | 1-2         | 2                   | 1-2                      | 2                         |
| <b>MIC SDS (%)</b>                         | 0,05        | 0,05                | 0,05                     | 0,025-0,05                |

Parental *RODA*

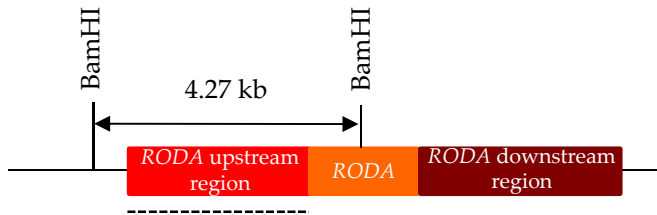

$\Delta rodA$

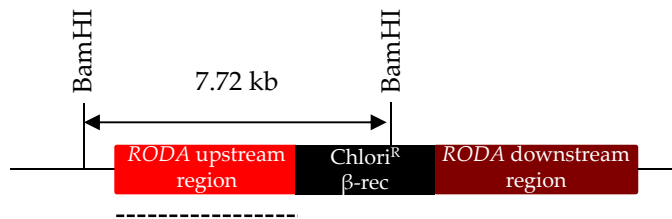

----- = *RODA* upstream region Dig-labeled probe

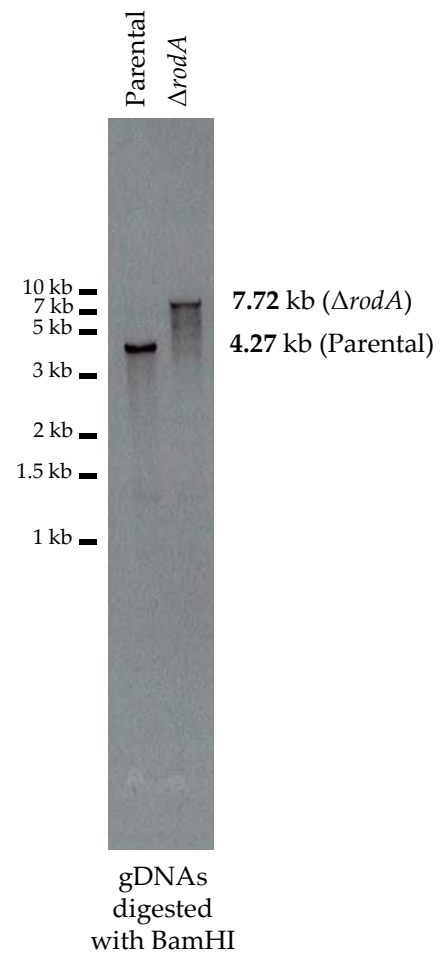

**Figure S1A:** Southern blot of the *A. fumigatus*  $\Delta rodA$  strain

Parental *RODB*

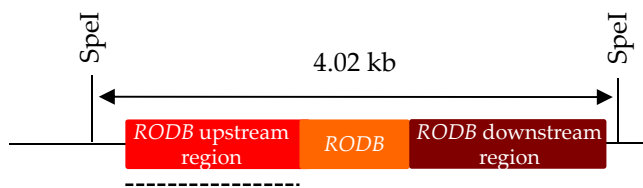

$\Delta rodB$

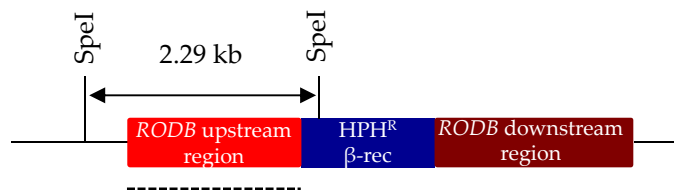

----- = *RODB* upstream region Dig-labeled probe

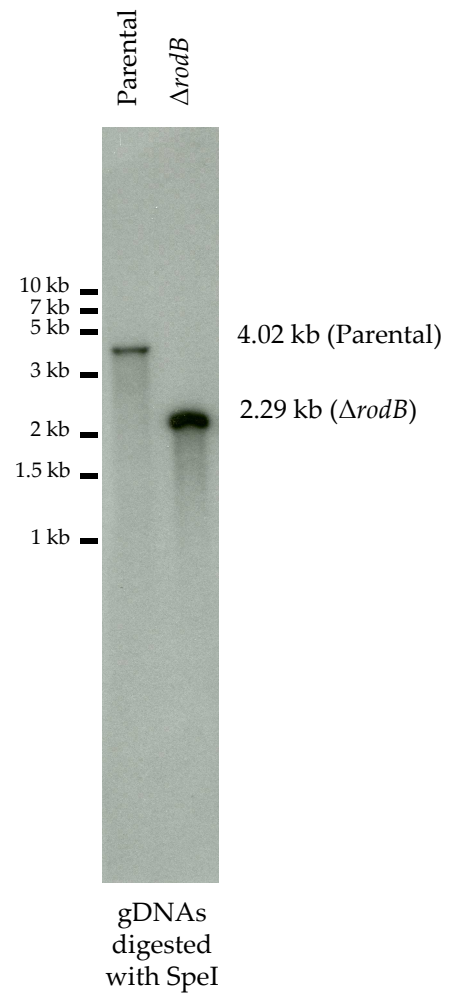

**Figure S1B:** Southern blot of the Southern blot of the *A. fumigatus*  $\Delta rodB$  strain.

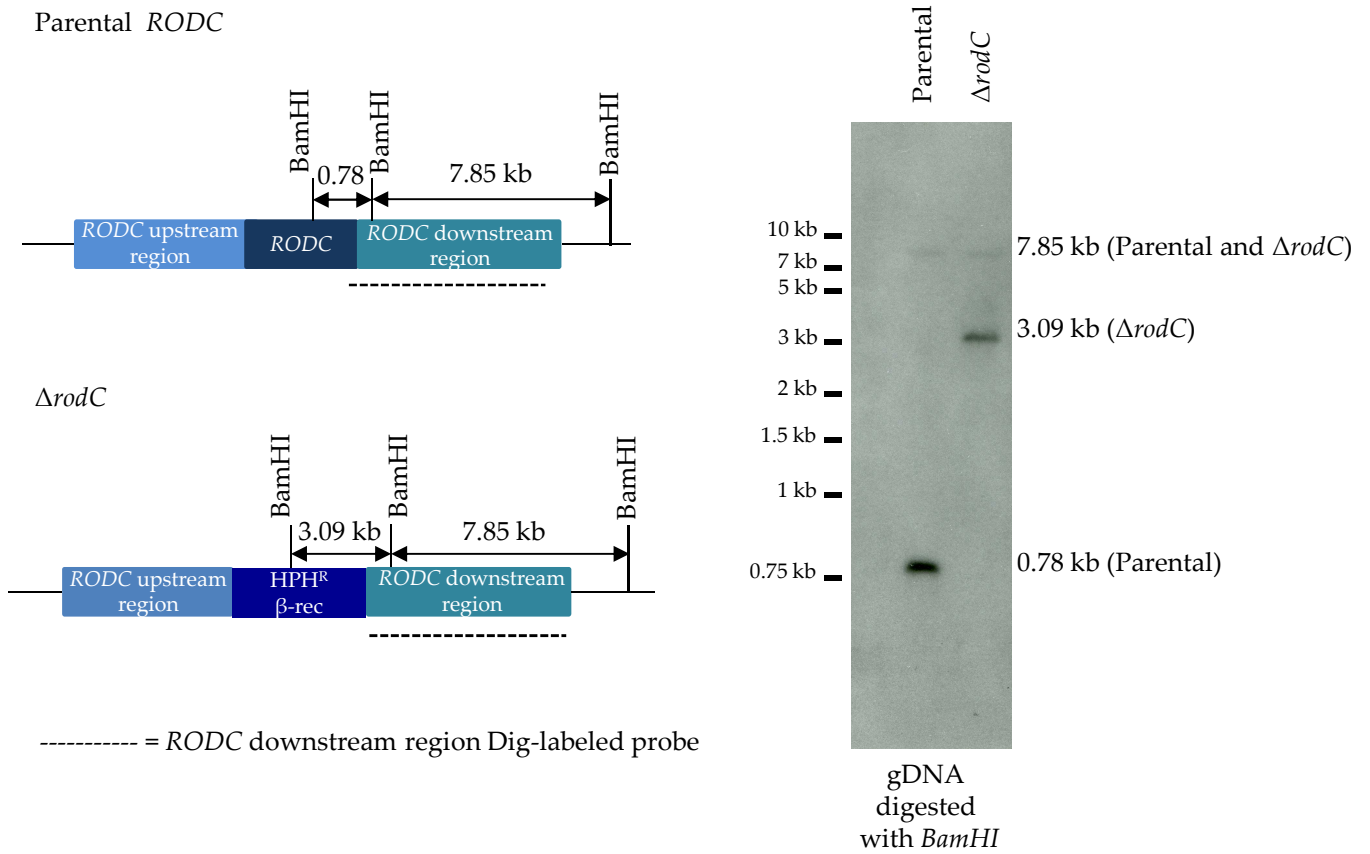

**Figure S1C:** Southern blot of the *A. fumigatus* *ΔrodC* strain

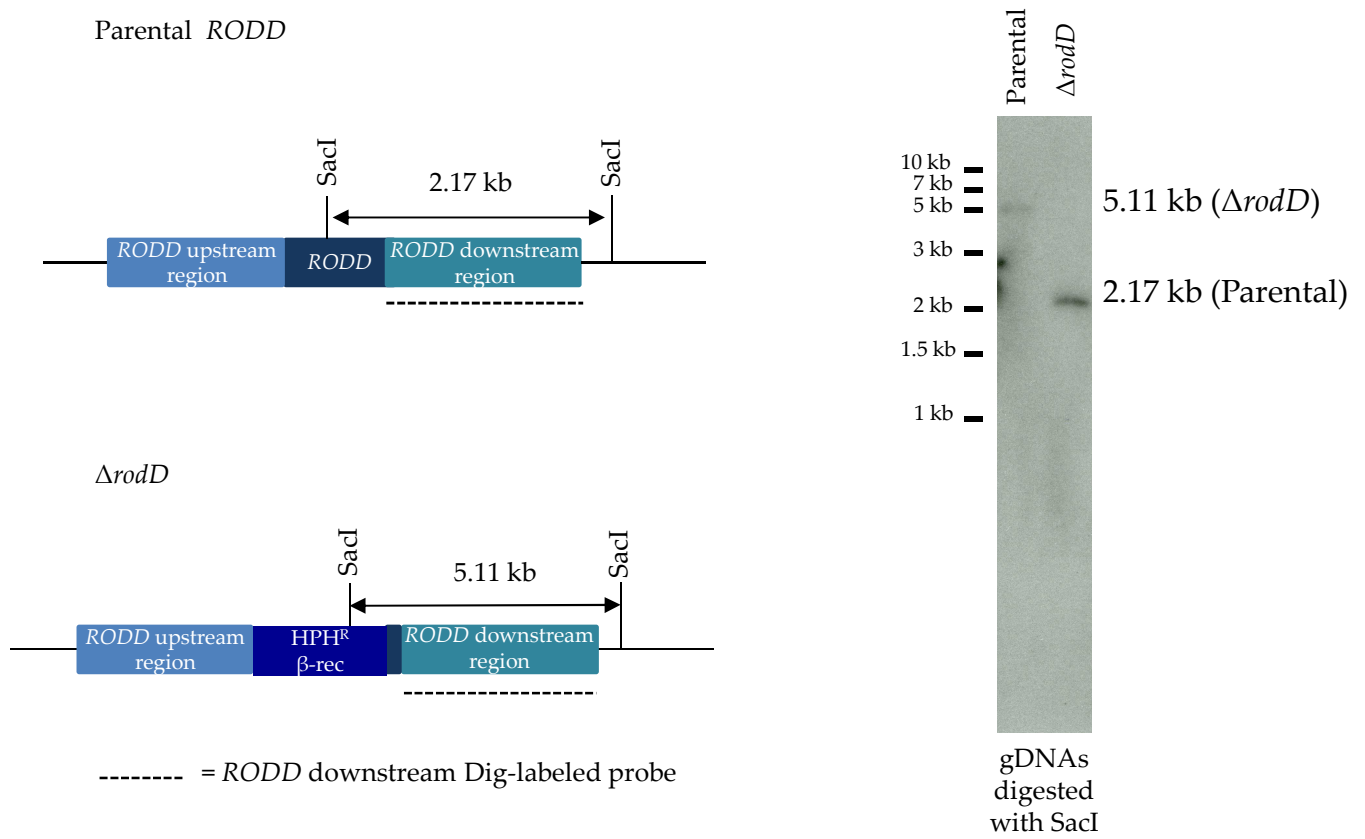

**Figure S1D:** Southern blot of the *A. fumigatus* *ΔrodD* strain



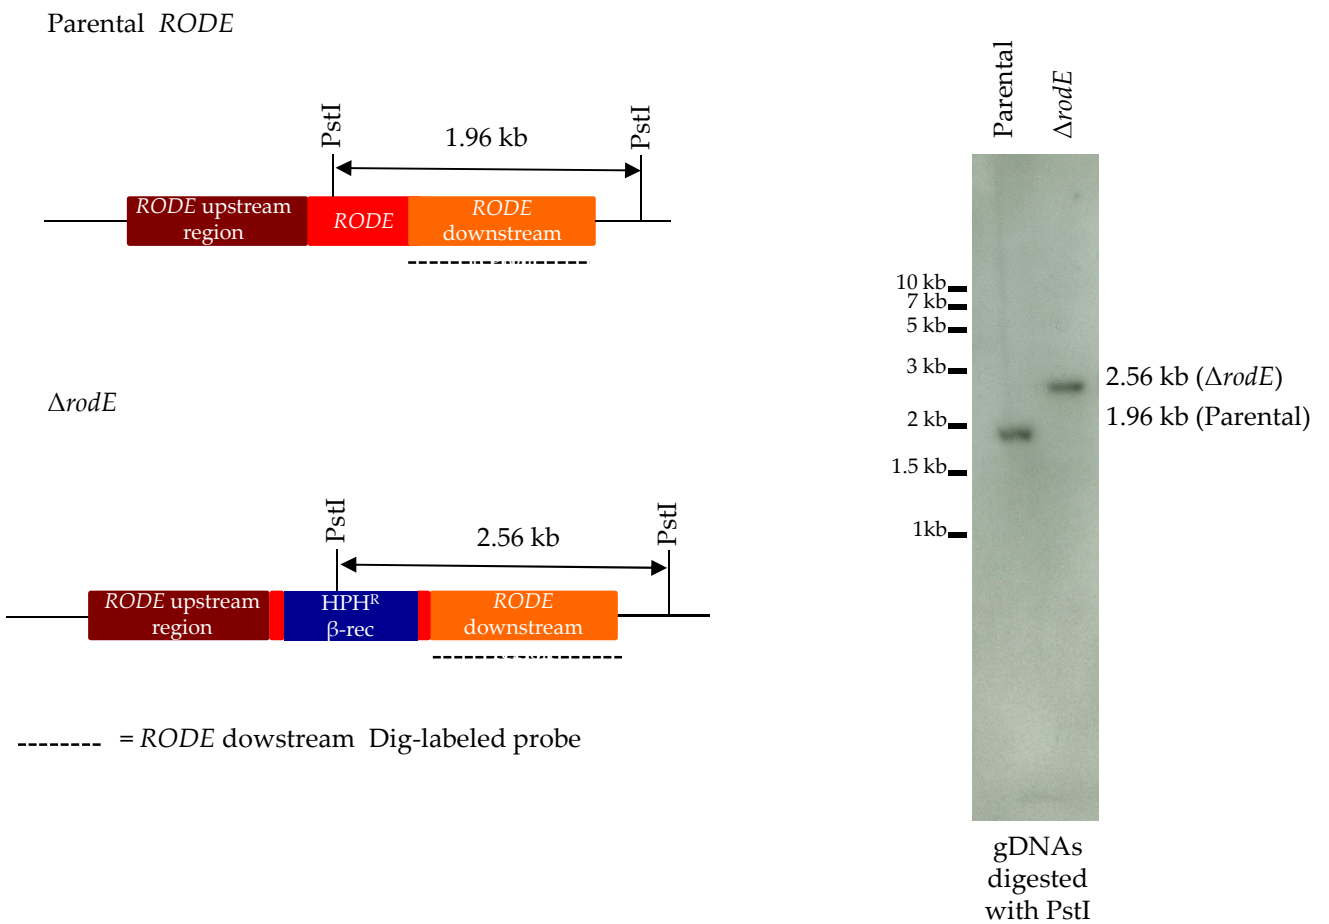

**Figure S1E:** Southern blot of the *A. fumigatus*  $\Delta rodE$  strain

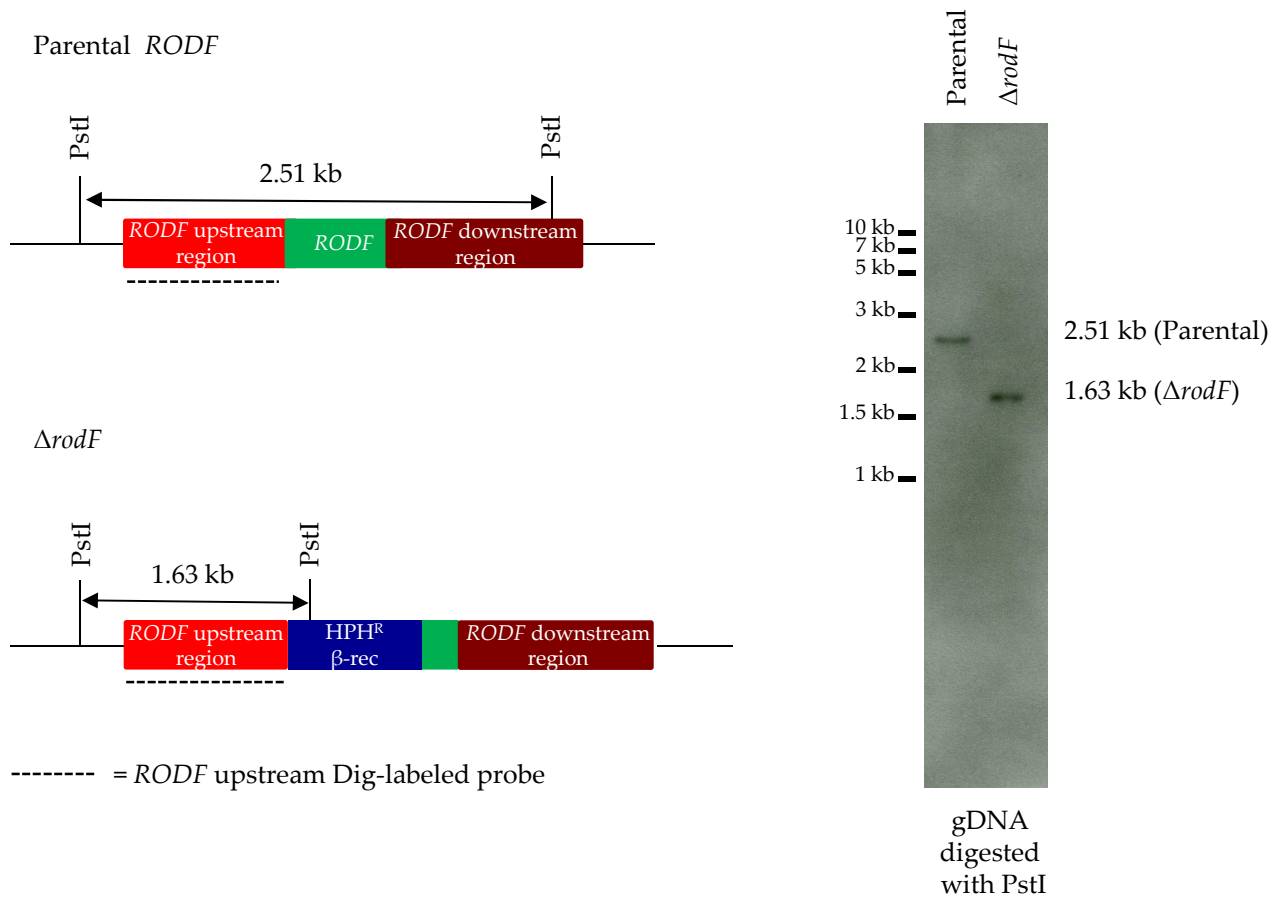

**Figure S1F:** Southern blot of the *A. fumigatus*  $\Delta rodF$  strain

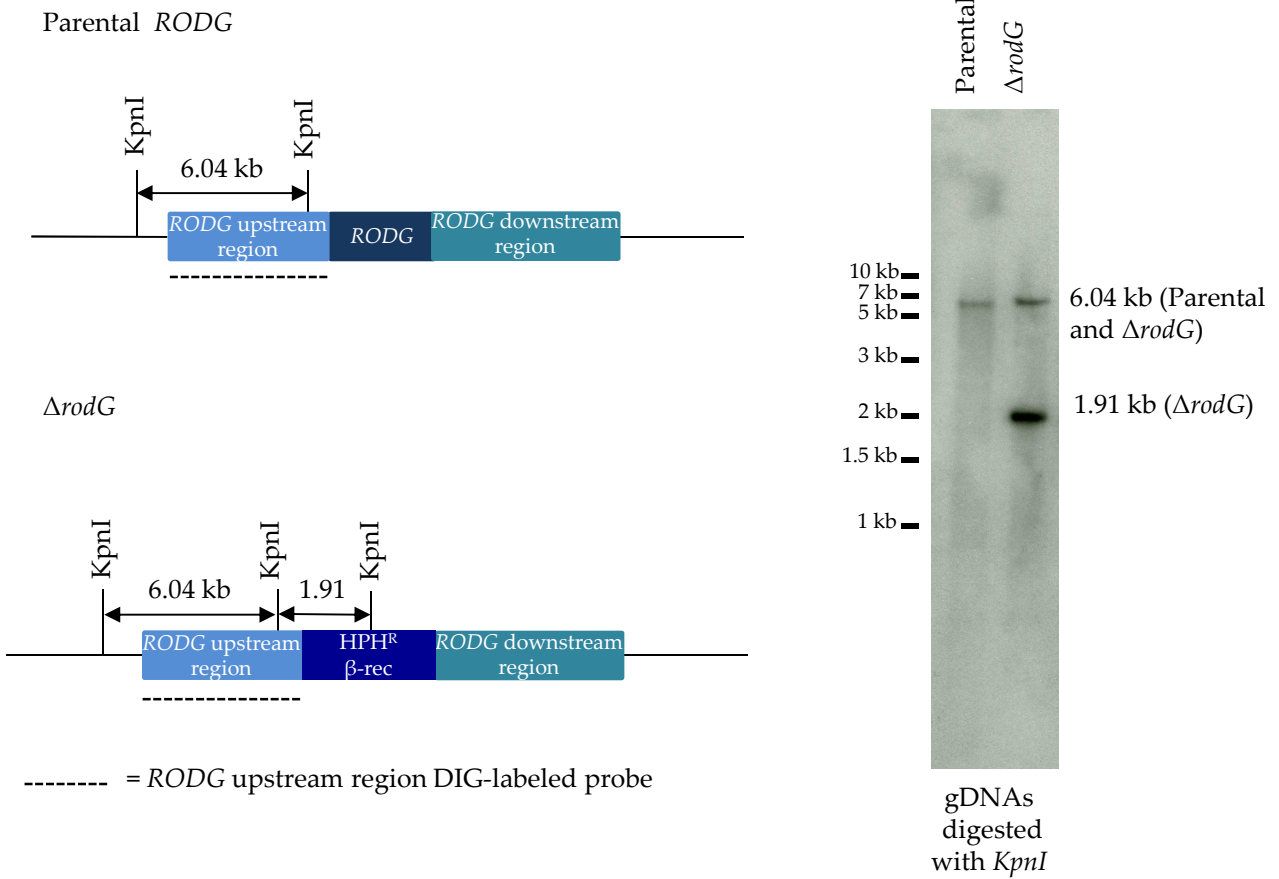

**Figure S1G:** Southern blot of the *A. fumigatus*  $\Delta rodG$  strain

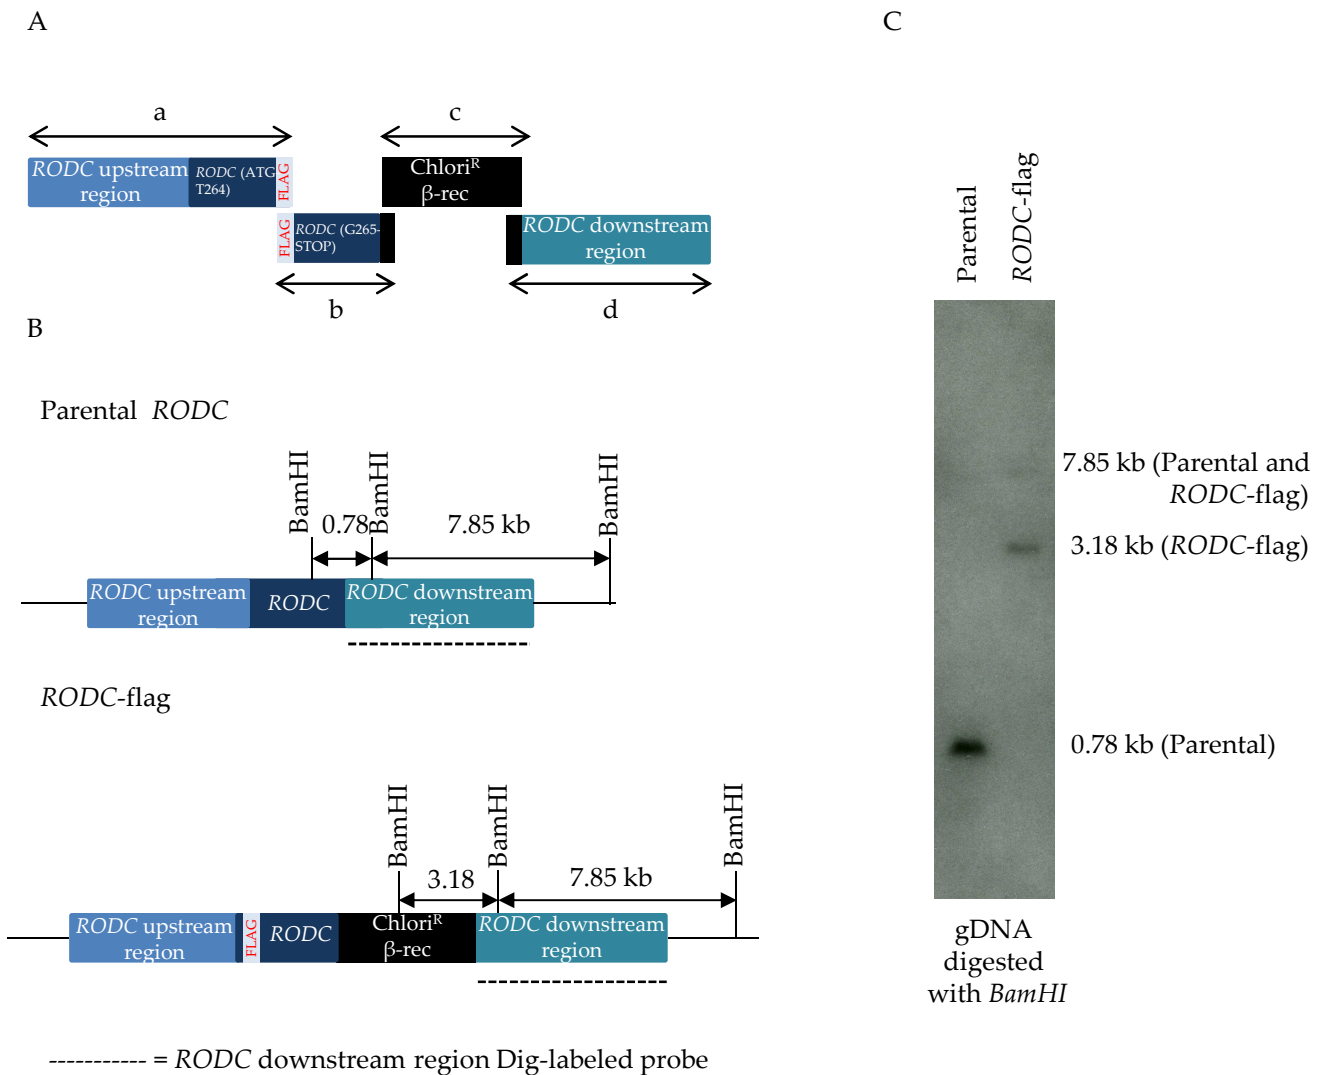

**Figure S1H:** Construction of the *A. fumigatus* RodC-flag strain. A. Schema of the 4 DNA fragments used for the RodC-flag DNA construct. B. Diagram showing *Bam*HI digestion site and Dig labelled probe localization. C. Southern blot analysis. gDNA of parental and RodC-flag strain were digested with *Bam*HI, run it on a 0.7% agarose gel and transferred in a nitrocellulose membrane, which was then annealed with the DIG labelled probe containing the downstream border as is shown in the diagram B.

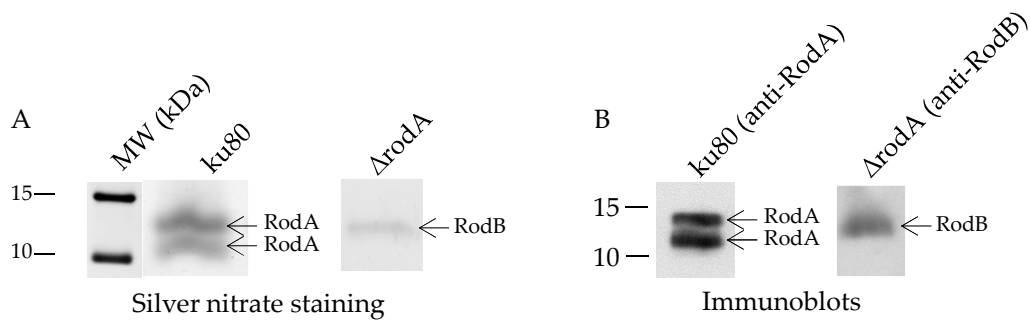

**Figure S2** : immunoblotting localization of RodA and RodB using the newly prepared anti-recombinant RodA and RodB antisera on formic acid (for RodA) or TFA-soluble SDS-insoluble extracts (for RodB) of ku80 and  $\Delta rodA$  conidia. Upon extraction, RodA produces two bands corresponding to 14.4 kDa and 12.2 kDa as already described (Aimanianda *et al.* 2009). Because of the similar size of the expected mature protein for RodB (12.8 kDa), RodB was observed in  $\Delta rodA$ . A: SDS-PAGE (15% polyacrylamide) gels were stained with silver nitrate or B: transferred to nitrocellulose and probed with polyclonal anti-RodA (on ku80 extract) or anti-RodB (on  $\Delta rodA$  extract) antibodies.

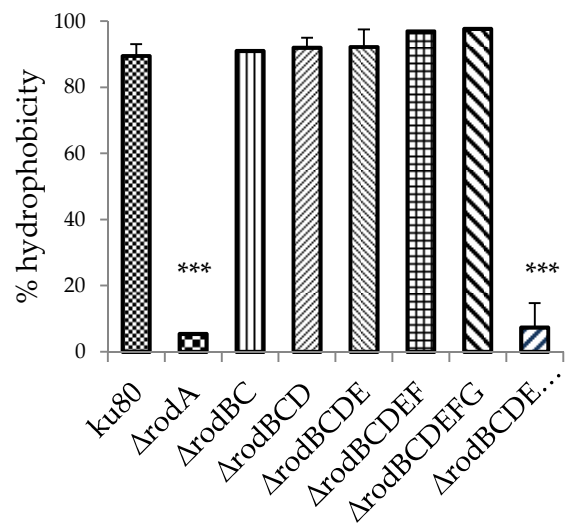

**Figure S3** : Hydrophobicity of hydrophobin mutant conidia and parental strain ku80. \*\*\*,  $P < 0.001$ .

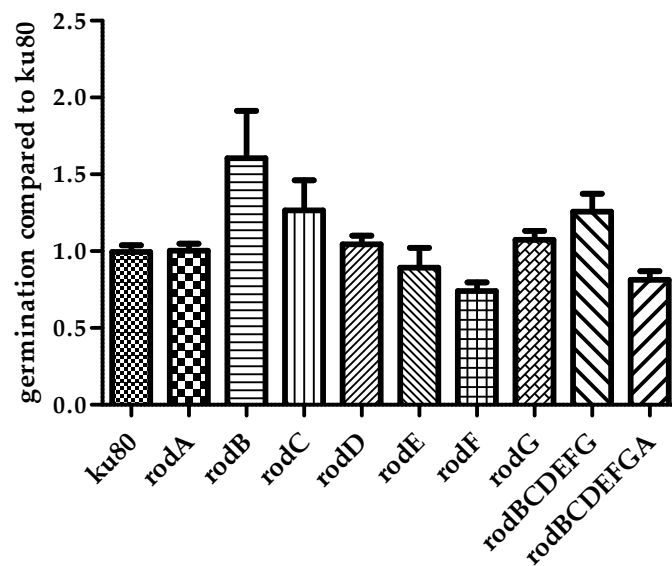

**Figure S4** : Germination of hydrophobin mutants in GYE medium after 7 hr at 37°C. Germination rates were normalized to the culture compared with the parental strain ku80, with 1 representing 60 to 75 % germination. Statistical tests were performed with Graph Pad Prism 3.0 and showed non significant difference between the strains.

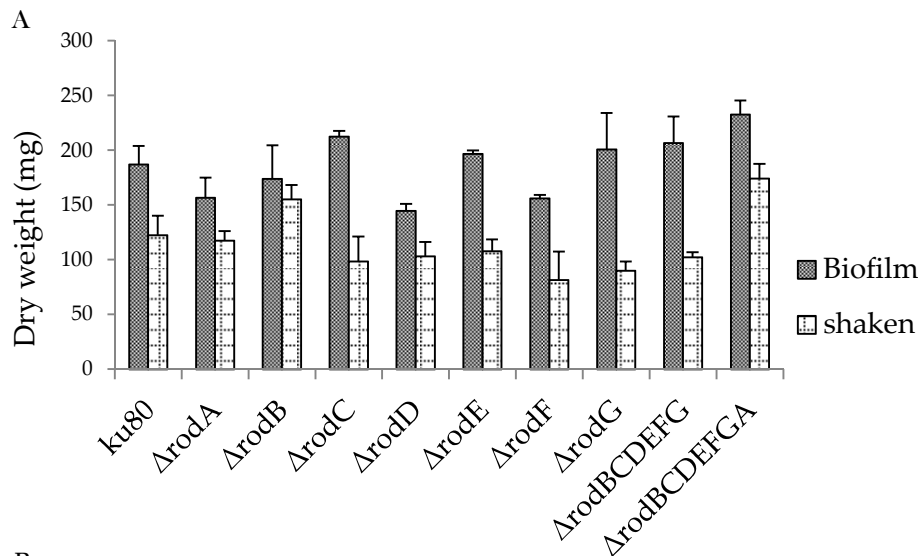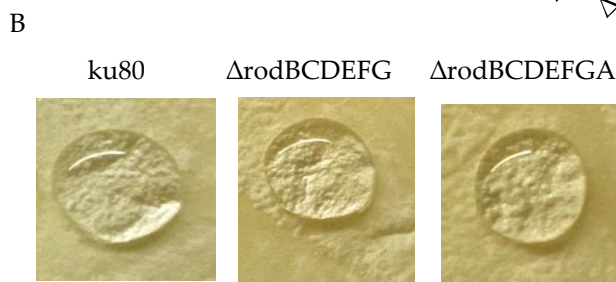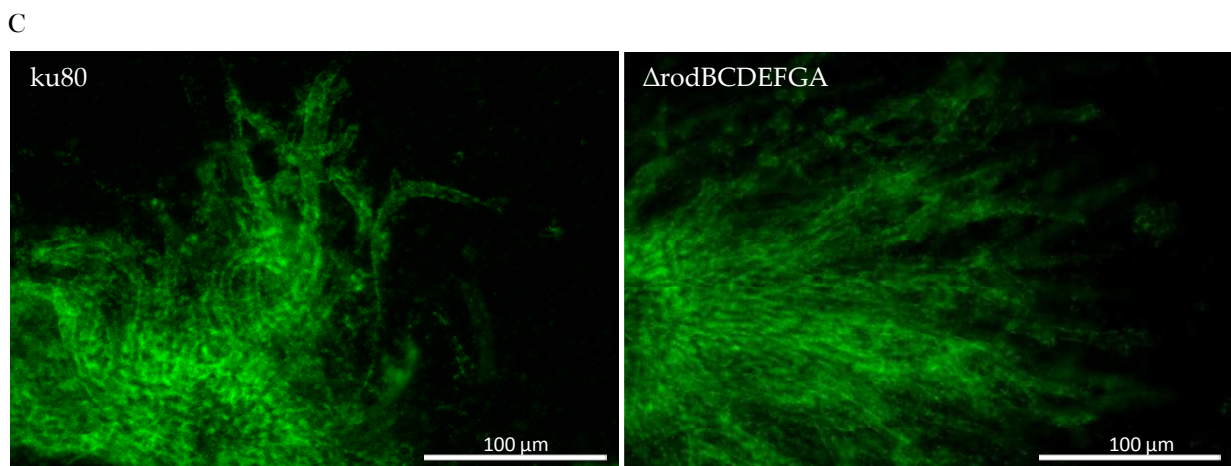

**Figure S5** : Characteristics of the mycelium of ku80 and hydrophobin mutants in aerial and static biofilm or submerged and shaken planktonic conditions . A: Biomass (dry weight of the recovered mycelium after 24 hr growth at 30°C), showing similar growth of hydrophobin mutants and ku80; B: hydrophobicity of biofilms observed by placing 10  $\mu$ L drops of 0.2% SDS in 50 mM EDTA on the surface of the biofilm, showing that the surface of the biofilm of all strains presented the same hydrophobicity (no soaking of the drops into the biofilm); C: binding of *P. aeruginosa* Pa14 (GFP-strain), on ku80 and  $\Delta rodBCDEFGA$  hyphae, showing a similar binding of the bacteria on the hydrophobin mutant and parental strain hyphae.
